# Supplementary material for: Real-world risk of hypoglycemia-related hospitalization in Japanese patients with type 2 diabetes using SGLT2 inhibitors: a nationwide cohort study
Source: PubMed Central journal article supplement — BMJ Open Diabetes Res Care. 2020 Nov 27;8(2):e001856. doi: 10.1136/bmjdrc-2020-001856 (PMC7703042; doi:10.1136/bmjdrc-2020-001856), 2020-11-27
Supplement: bmjdrc-2020-001856supp001.pdf [file bmjdrc-2020-001856supp001.pdf]

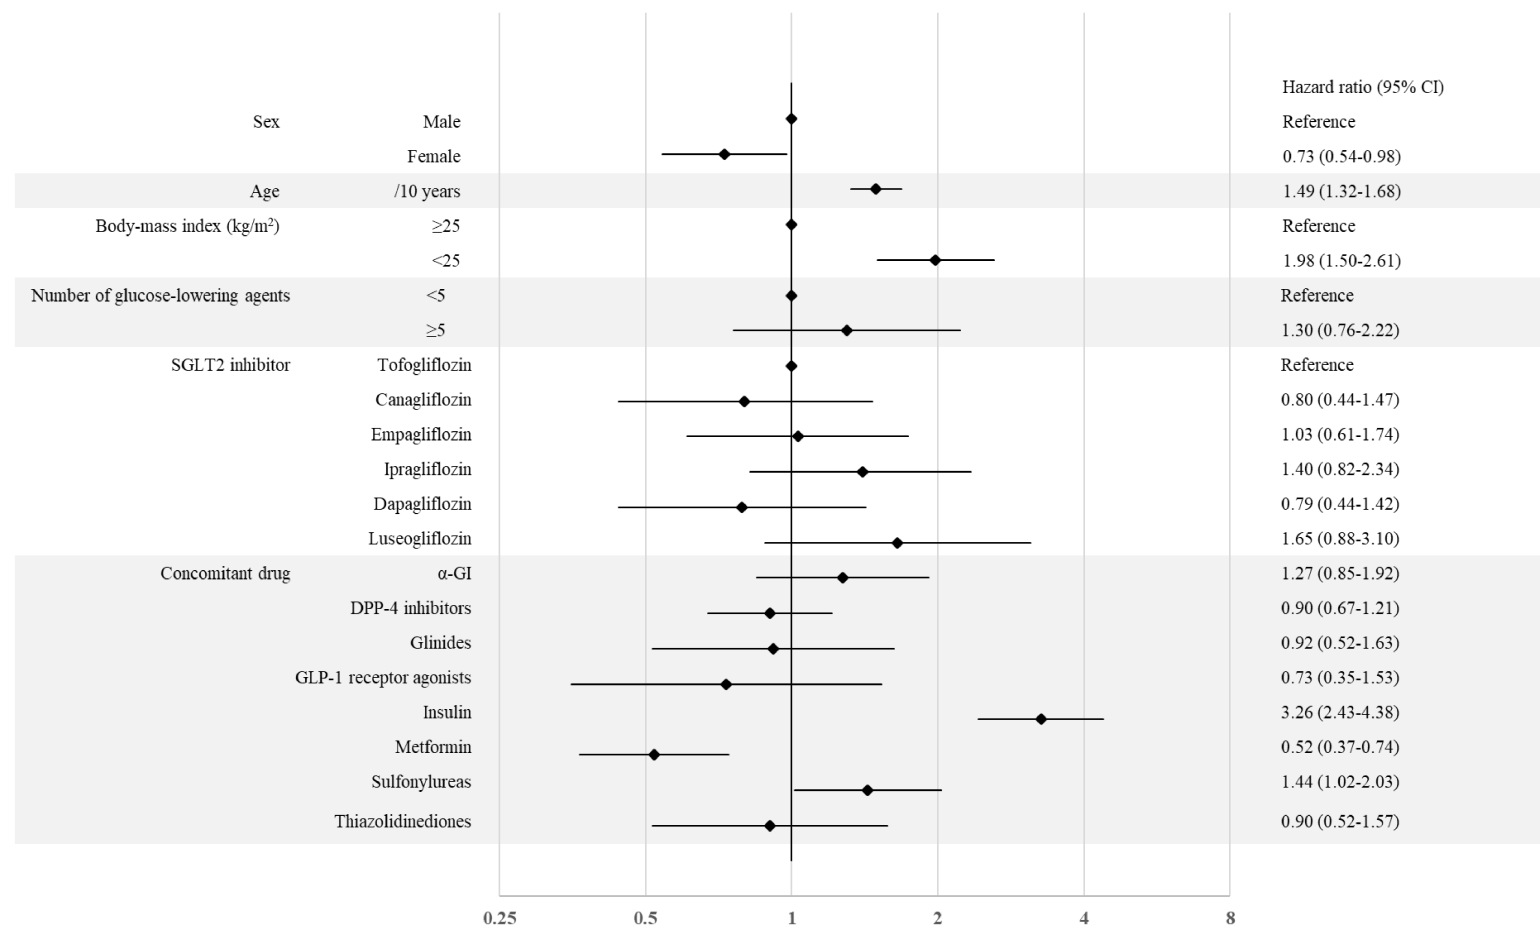

### Supplementary Figure 1. Factors linked to the risk of hypoglycemia among patients with test results for type of SGLT2 inhibitor.

The forest plot indicates the hazard ratios (diamonds) and 95% CIs (horizontal bars) for hypoglycemia among patients with type 2 diabetes using sodium-glucose co-transporter 2 inhibitors, and for whom type of sodium-glucose co-transporter 2 inhibitors test results were available, according to baseline characteristics. CI, confidence interval; α-GI, alpha-glucosidase; DPP-4, dipeptidyl peptidase-4; GLP-1, glucagon-like peptide-1.
