# Supplementary material for: Real-world risk of hypoglycemia-related hospitalization in Japanese patients with type 2 diabetes using SGLT2 inhibitors: a nationwide cohort study
Source: PubMed Central journal article supplement — BMJ Open Diabetes Res Care. 2020 Nov 27;8(2):e001856. doi: 10.1136/bmjdrc-2020-001856 (PMC7703042; doi:10.1136/bmjdrc-2020-001856), 2020-11-27
Supplement: bmjdrc-2020-001856supp002.pdf [file bmjdrc-2020-001856supp002.pdf]

**Supplementary Table1. Patients' characteristics including HbA1c and eGFR at baseline among T2D using SGLT2 inhibitors**

|                               | Overall (n=16,754) |               | Hypoglycemia (+) (n=30) |           | Hypoglycemia (-) (n=16,724) |               | p value |
|-------------------------------|--------------------|---------------|-------------------------|-----------|-----------------------------|---------------|---------|
|                               | Mean ±S.D          | n(%)          | Mean ±S.D               | n(%)      | Mean ±S.D                   | n(%)          |         |
| <b>Gender</b>                 |                    |               |                         |           |                             |               |         |
| Male                          |                    | 10,941 (65.3) |                         | 18 (60.0) |                             | 10,923 (65.3) | 0.541   |
| Female                        |                    | 5,813 (34.7)  |                         | 12 (40.0) |                             | 5,801 (34.7)  |         |
| <b>Age (years)</b>            |                    |               |                         |           |                             |               |         |
|                               | 61.9±13.3          |               | 70.7±11.7               |           | 61.8±13.3                   |               | <0.001  |
| <25                           |                    | 81 (0.5)      |                         | 0         |                             | 81 (0.5)      | <0.001  |
| 25-<44                        |                    | 1,781 (10.6)  |                         | 0         |                             | 1,781 (10.6)  |         |
| 45-<64                        |                    | 7,006 (41.8)  |                         | 10 (33.3) |                             | 6,996 (41.8)  |         |
| ≥65                           |                    | 7,886 (47.1)  |                         | 20 (66.7) |                             | 7,866 (47.0)  |         |
| <b>BMI (kg/m<sup>2</sup>)</b> |                    |               |                         |           |                             |               |         |
|                               | 27.4±5.9           |               | 25.2±4.6                |           | 27.4±5.9                    |               | 0.046   |
| <25                           |                    | 10,938 (65.3) |                         | 16 (53.3) |                             | 10,922 (65.3) | 0.169   |
| ≥25                           |                    | 5,816 (34.7)  |                         | 14 (46.7) |                             | 5,802 (34.7)  |         |
| <b>HbA1c (%)</b>              |                    |               |                         |           |                             |               |         |
|                               | 7.49±1.30          |               | 7.03±1.2                |           | 7.50±1.3                    |               | 0.027   |
| <7.0                          |                    | 6,354 (37.9)  |                         | 13 (43.3) |                             | 6,341 (37.9)  | 0.541   |
| ≥7.0                          |                    | 10,400 (62.1) |                         | 17 (56.7) |                             | 10,383 (62.1) |         |
| <b>eGFR (mL/min)</b>          |                    |               |                         |           |                             |               |         |
|                               | 71.6±26.3          |               | 55.2±33.2               |           | 72.6±26.2                   |               | <0.001  |
| ≥60                           |                    | 11,417 (68.1) |                         | 11 (36.7) |                             | 11,406 (68.2) | <0.001  |

|                                                 |              |           |              |        |
|-------------------------------------------------|--------------|-----------|--------------|--------|
| 30-59                                           | 4,612 (27.5) | 12 (40.0) | 4,600 (27.5) |        |
| <30                                             | 725 (4.3)    | 7 (23.3)  | 718 (4.3)    |        |
| Baseline use of other anti-diabetic medications |              |           |              |        |
| $\alpha$ -GI                                    | 2,282 (13.6) | 6 (20.0)  | 2,276 (13.6) | 0.308  |
| DPP-4 inhibitors                                | 9,668 (57.7) | 19 (63.3) | 9,649 (57.7) | 0.532  |
| Glinides                                        | 929 (5.5)    | 5 (16.7)  | 924 (5.5)    | 0.008  |
| GLP-1 agonists                                  | 654 (3.9)    | 2 (6.7)   | 652 (3.9)    | 0.434  |
| Insulin                                         | 3,550 (45.7) | 17 (56.7) | 3,533 (21.1) | <0.001 |
| Metformin                                       | 7,389 (44.1) | 7 (23.3)  | 7,382 (44.1) | 0.022  |
| Sulfonylureas                                   | 3,895 (23.2) | 9 (30.0)  | 3,886 (23.2) | 0.381  |
| Thiazolidinedilones                             | 1,371 (8.2)  | 4 (13.3)  | 1,367 (8.2)  | 0.303  |

HbA1c, glycohemoglobin; eGFR, estimated glomerular filtration rate; T2D, type 2 diabetes; SGLT2, sodium-glucose co-transporter 2; hypoglycemia (+), patients with hypoglycemic events; hypoglycemia (-), patients without hypoglycemic events; SD, standard deviation; BMI, body-mass index;  $\alpha$ -GI, alpha-glucosidase inhibitor; DPP-4, dipeptidyl peptidase-4; GLP-1, glucagon-like peptide-1. P values were calculated for differences between patients with and without hypoglycemic events.
